# Supplementary material
Source: PubMed Central journal article supplement (PMC4862710)
Supplement: IAI.01173-15_zii999091616so1.pdf [file IAI.01173-15_zii999091616so1.pdf]

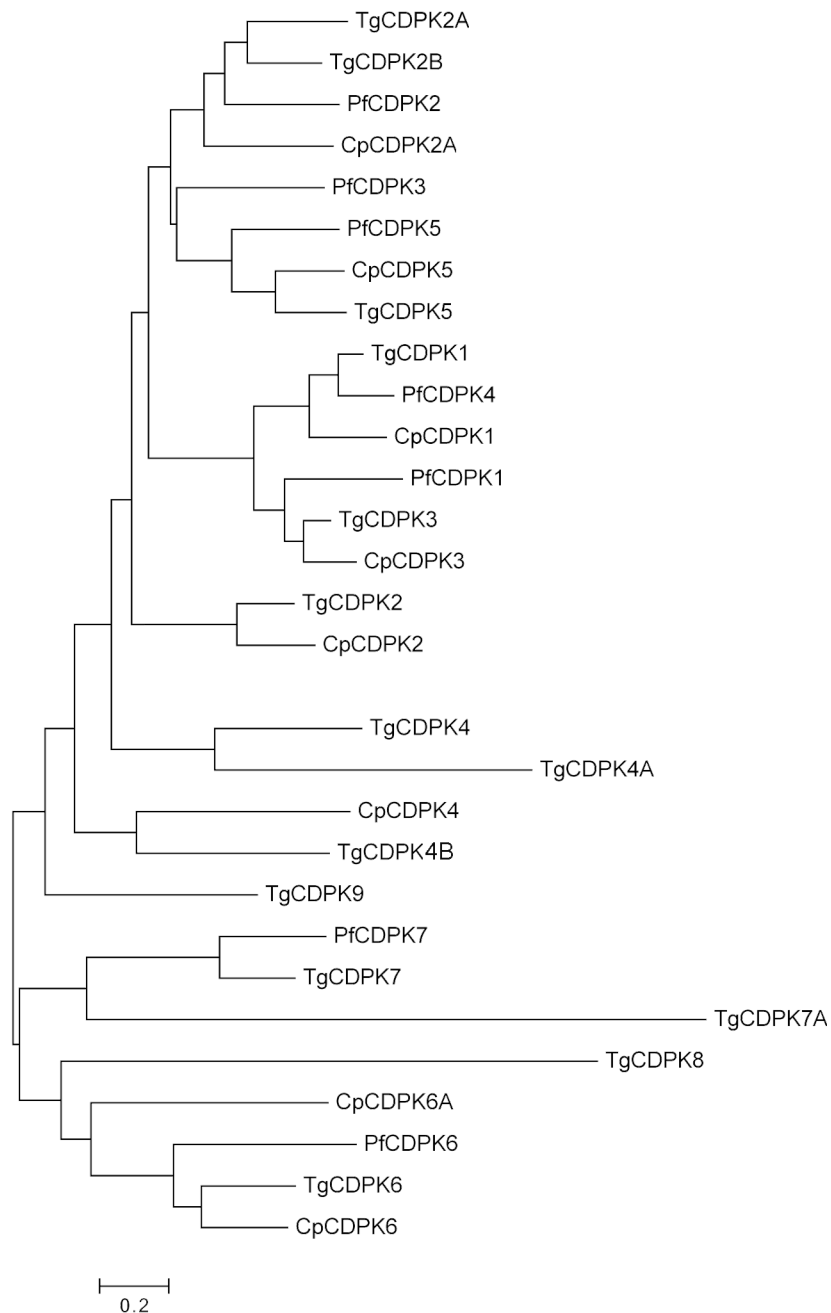

**Fig. S1.** Phylogenetic representation of the CDPKs in *Plasmodium falciparum* (Pf), *Toxoplasma gondii* (Tg) and *Cryptosporidium parvum* (Cp). The numbering schemes of CDPKs among different parasites are also not identical, largely for historical reasons. Protein names from (1) with inclusion of two new genes from *T. gondii*: TgCDPK4B (TgME49\_292055) and TgCDPK7A (TgME49\_237860) (<http://ToxoDB.org>). Tree was generated using MEGA (6.06 MAC) using a Maximum Likelihood algorithm (2).

1. **Billker O, Lourido S, Sibley LD.** 2009. Calcium-dependent signaling and kinases in apicomplexan parasites. *Cell Host Microbe* **5**:612 - 622.
2. **Tamura K, Stecher G, Peterson D, Filipowski A, Kumar S.** 2013. MEGA6: Molecular Evolutionary Genetics Analysis version 6.0. *Mol Biol Evol* **30**:2725-2729.

A.

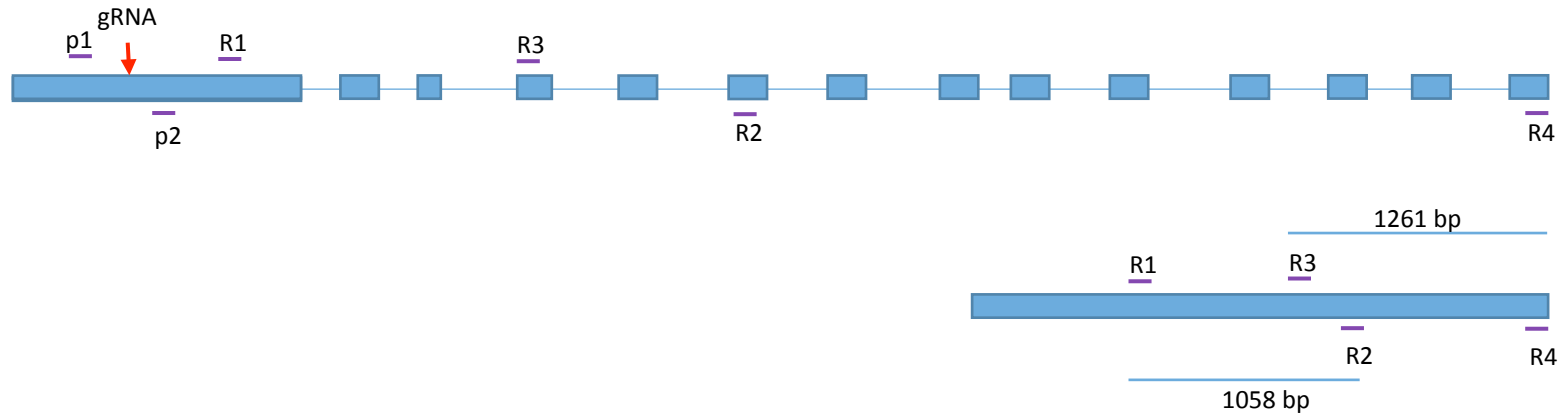

B.

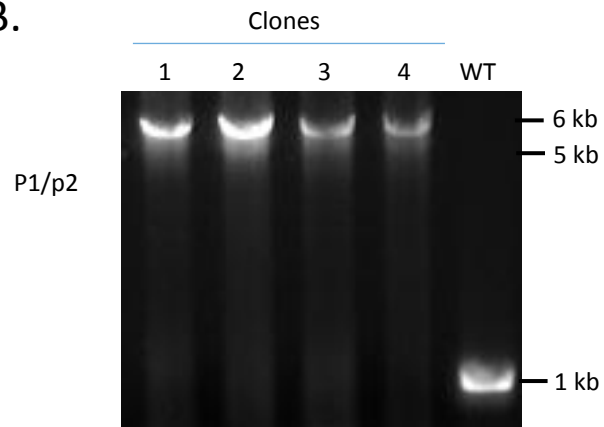

C.

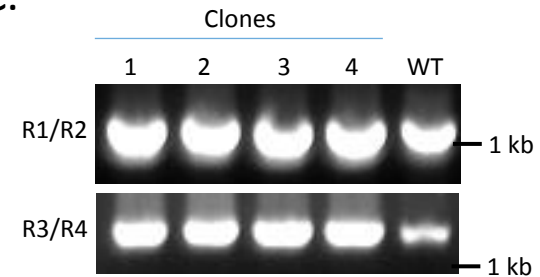

**Fig. S2.** Generation of a *CDPK6* disruptant and diagnostic PCR and RT-PCR. (A) a cartoon showing the *CDPK6* gene structure and the gene coding sequences. The single gRNA targeting site and primers for a diagnostic PCR of gene disruption and primers for RT-PCR are shown. (B) A diagnostic PCR using primer p1 and p2. C. RT-PCR testing the expression of downstream of gene disruption site.

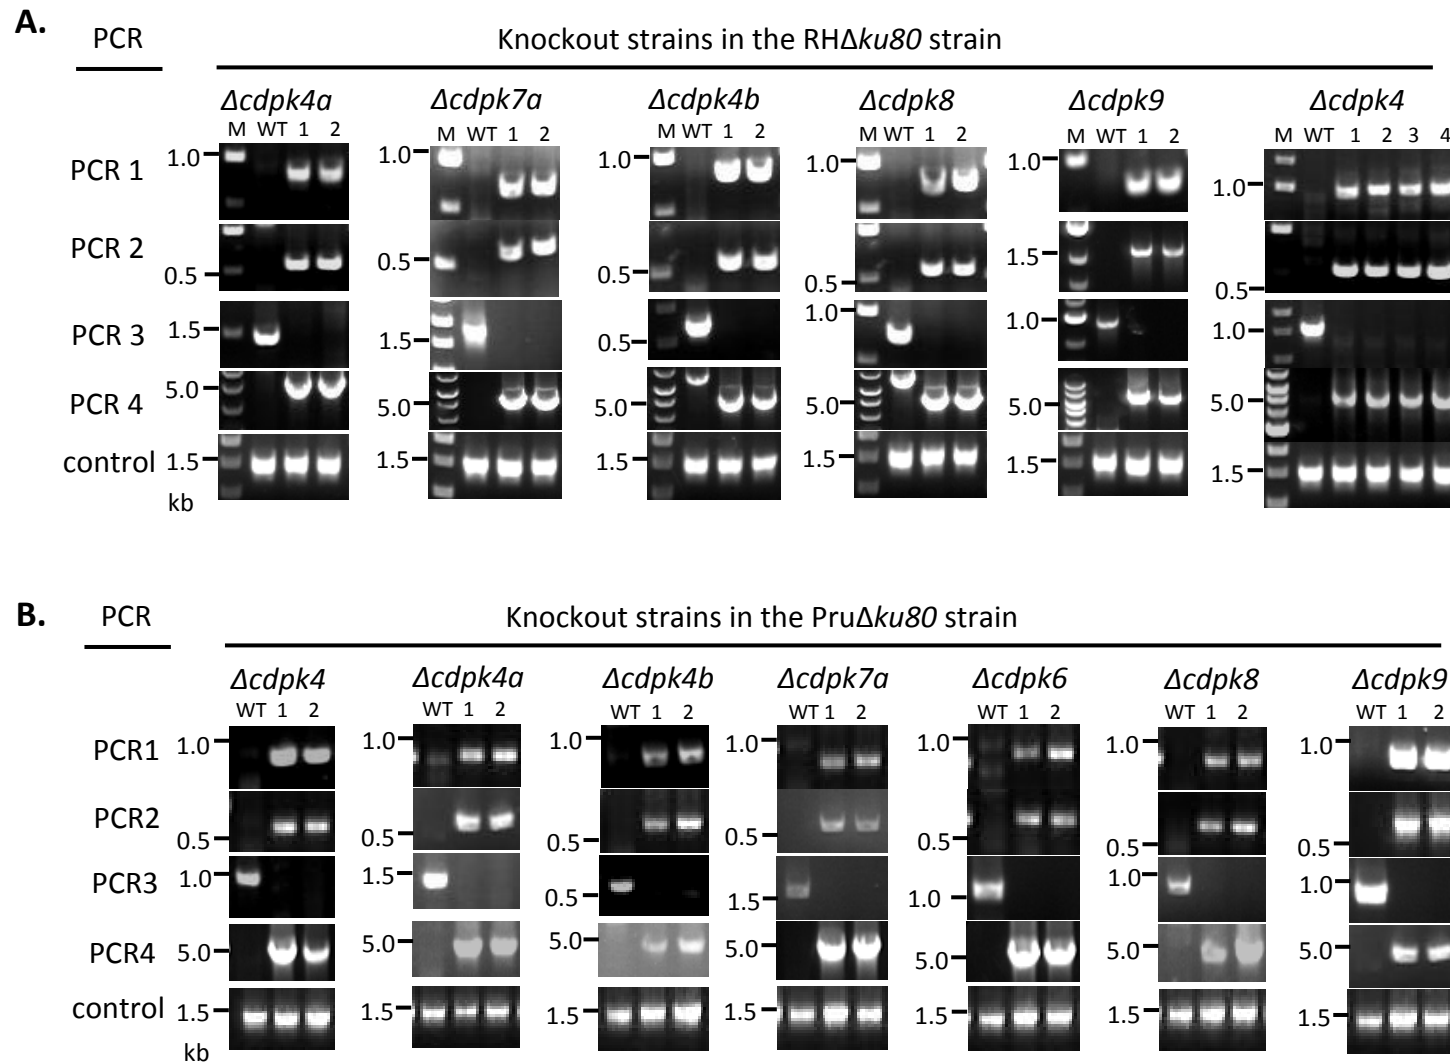

**Fig. S3.** Diagnostic PCR to confirm single *CDPK* gene knockouts in the RH $\Delta ku80$  (A) and Pru $\Delta ku80$  (B) strains. Diagnostic PCRs were designed as illustrated in Fig. 2A.

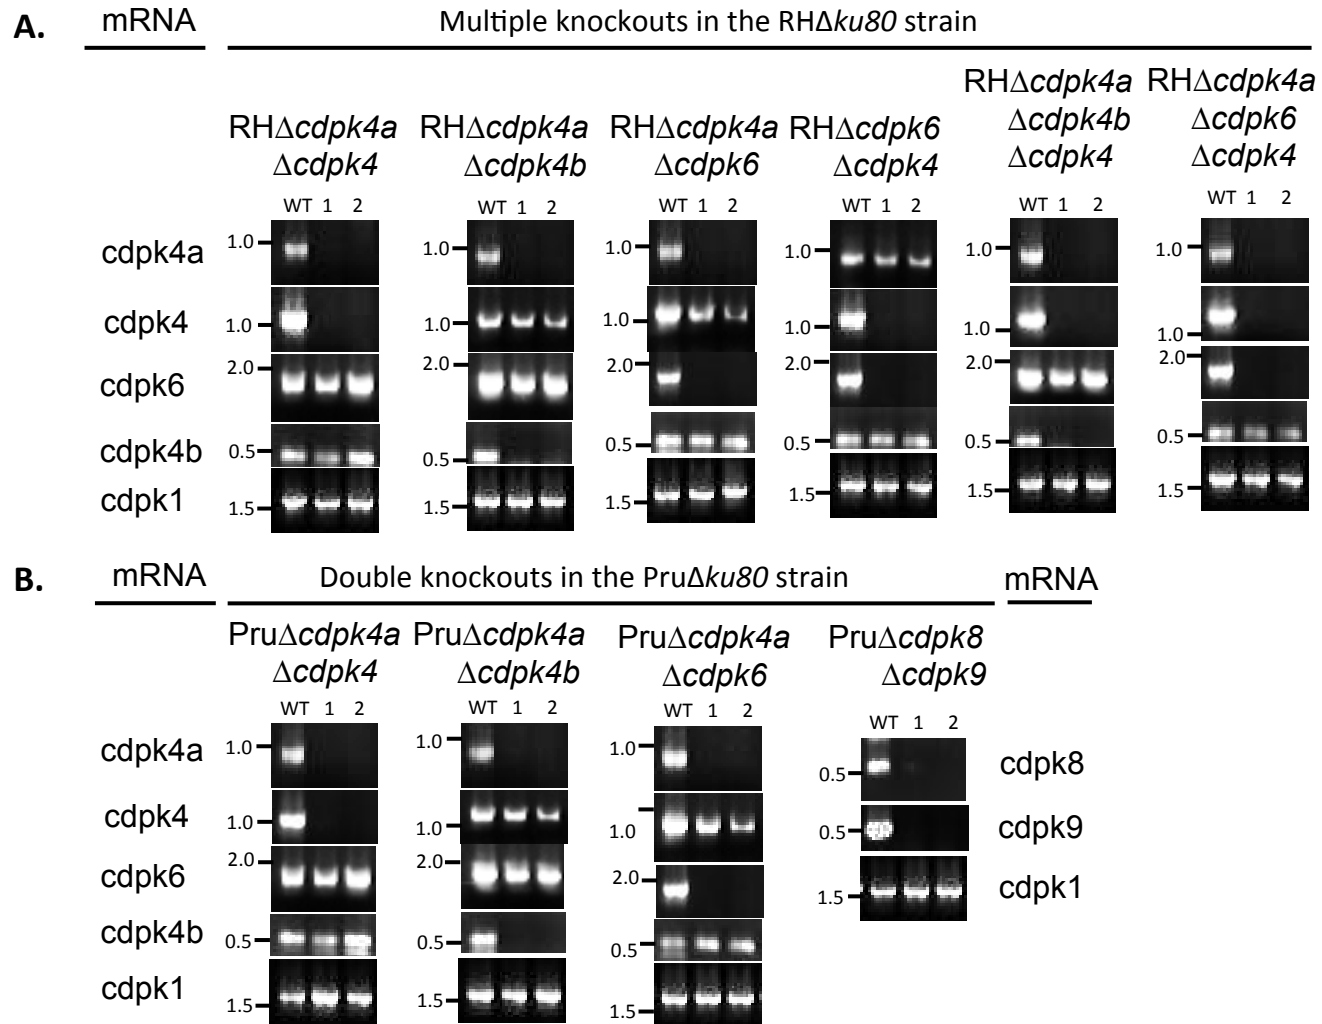

**Fig. S4.** RT-PCR confirmation of multiple *CDPK* gene knockouts in the RH $\Delta ku80$  and Pru $\Delta ku80$  strains. Multiple knockouts both in the RH $\Delta ku80$  strain (A) and Pru $\Delta ku80$  strains (B) were generated using the same strategy used for the single gene knockouts, after excision of the DHFR-mCherry cassette by transfection of a Cre-GFP plasmid. *CDPK1* served as a positive control for RNA template quality in all the cDNA samples.

**Table S1. primers for a *CDPK6* disruptant using a single gRNA strategy**

| <b>Names</b> | <b>Primer Sequence (5'-3')</b>                      |
|--------------|-----------------------------------------------------|
| K6sgRNA      | GCCTCGAACGTACGTGCCAG GTTTTAGAGCTAGAAATAGC           |
| K6HR1        | GTTTTGTGGTGTGCGCCGGCACCTGGCGAGCC CGACGGCCAGTGAATTCG |
| K6HR2        | CAAGTTTCGGAAATCCCAGTCTTCCAGCCCCT ATACGACTCACTATAGGG |
| p1           | CAGGAAGCCACAGGGAAAAGAG                              |
| p2           | GAAACGCGAGATTCGACGC                                 |
| R1           | CCTCGACTCCAAGAGGCAAG                                |
| R2           | TTGCTTCATCAACTCAGCAAC                               |
| R3           | TAGTGGTTTGGAGCGTGTAATC                              |
| R4           | TTAGTCGTGGCGCATATACGC                               |

**Table S2. Primers for generation of CRISPR-Cas9 plasmids targeting to the non-canonical CDPKs in *T.gondii***

| Genes         | Names | Primer Sequence (5'-3')                          | CRISPR-Cas9 plasmids       | double CRISPR-Cas9 plasmids  |
|---------------|-------|--------------------------------------------------|----------------------------|------------------------------|
| <i>CDPK4</i>  | 4g1   | GGCTCAAGCGGCGAGGCCTG <b>GTTTTAGAGCTAGAAATAGC</b> | pCAS9-gRNA1/ <i>CDPK4</i>  | pCAS9-gRNA1-2/ <i>CDPK4</i>  |
|               | 4g2   | GACATCGCGGCTACACCATC <b>GTTTTAGAGCTAGAAATAGC</b> | pCAS9-gRNA2/ <i>CDPK4</i>  |                              |
| <i>CDPK4A</i> | 4ag1  | GTGGTGGGGCAGGGGGCGAG <b>GTTTTAGAGCTAGAAATAGC</b> | pCAS9-gRNA1/ <i>CDPK4A</i> | pCAS9-gRNA1-2/ <i>CDPK4A</i> |
|               | 4ag2  | ATGGTAAGGTCGCTCTTCG <b>GTTTTAGAGCTAGAAATAGC</b>  | pCAS9-gRNA2/ <i>CDPK4A</i> |                              |
| <i>CDPK4B</i> | 4bg1  | GTCATGGAGCTCTGCCGAGG <b>GTTTTAGAGCTAGAAATAGC</b> | pCAS9-gRNA1/ <i>CDPK4B</i> | pCAS9-gRNA1-2/ <i>CDPK4B</i> |
|               | 4bg2  | CTCGGAGCACCGTAACGAAA <b>GTTTTAGAGCTAGAAATAGC</b> | pCAS9-gRNA2/ <i>CDPK4B</i> |                              |
| <i>CDPK6</i>  | 6g1   | GCCTCGAACGTACGTGCCAG <b>GTTTTAGAGCTAGAAATAGC</b> | pCAS9-gRNA1/ <i>CDPK6</i>  | pCAS9-gRNA1-2/ <i>CDPK6</i>  |
|               | 6g2   | TCTTGAATGCGTTTAGTCG <b>GTTTTAGAGCTAGAAATAGC</b>  | pCAS9-gRNA2/ <i>CDPK6</i>  |                              |
| <i>CDPK7A</i> | 7ag1  | TCAATCTgtaaggtgtcga <b>GTTTTAGAGCTAGAAATAGC</b>  | pCAS9-gRNA1/ <i>CDPK7A</i> | pCAS9-gRNA1-2/ <i>CDPK7A</i> |
|               | 7ag2  | GAATCGCTGGGAGCTGTTTT <b>GTTTTAGAGCTAGAAATAGC</b> | pCAS9-gRNA2/ <i>CDPK7A</i> |                              |
| <i>CDPK8</i>  | 8g1   | GACGACGAGGCTCGCCAGC <b>GTTTTAGAGCTAGAAATAGC</b>  | pCAS9-gRNA1/ <i>CDPK8</i>  | pCAS9-gRNA1-2/ <i>CDPK8</i>  |
|               | 8g2   | GCGATTCTCTATCACATG <b>GTTTTAGAGCTAGAAATAGC</b>   | pCAS9-gRNA2/ <i>CDPK8</i>  |                              |
| <i>CDPK9</i>  | 9g1   | GATATGCAGAGCGTAAGCTG <b>GTTTTAGAGCTAGAAATAGC</b> | pCAS9-gRNA1/ <i>CDPK9</i>  | pCAS9-gRNA1-2/ <i>CDPK9</i>  |
|               | 9g2   | GAAAACAGAGAGCAGCTAAG <b>GTTTTAGAGCTAGAAATAGC</b> | pCAS9-gRNA2/ <i>CDPK9</i>  |                              |
| <i>CDPK1</i>  | 1g1   | GCGGGGACCAGCGGTGACCG <b>GTTTTAGAGCTAGAAATAGC</b> | pCAS9-gRNA1/ <i>CDPK1</i>  |                              |
| <i>CDPK7</i>  | 7g1   | GGGCGTCCAGTCGACCCGCG <b>GTTTTAGAGCTAGAAATAGC</b> | pCAS9-gRNA1/ <i>CDPK7</i>  |                              |

The red sequence in the primers indicate sequence matching to the gRNA scaffold right after the gRNA in the previously reported CRISPR CAS9-gRNA plasmid .

**Table S3. Primer sets for constructing pLoxP-DHFR-mCherry**

| Primer sets | Sequence (5'-3')                                                                                                         | Fragments               |
|-------------|--------------------------------------------------------------------------------------------------------------------------|-------------------------|
| Set 1       | TGAATTCGAGCTCGGTACCCataacttcgtatagcatacattatacgaagtataagcttcgccaggctgtaaactc<br>actccacctccaccgacagccatctccatctggatt     | LoxP-DHFR 5'UTR-DHFR-TS |
| Set 2       | ggtggaggtggaagtatggccatcatcaaggagttcatg<br>GTCGACTCTAGAGGATCCCCataacttcgtataatgtatgctatacgaagtatgatattgacccatgtggcgcgt   | mCherry-SAG1 3'UTR-LoxP |
| Set 3       | GGGGATCCTCTAGAGTCGAC<br>GGGTACCGAGCTCGAATTCA                                                                             | plasmid backbone        |
| Set 4       | tGTACAAGtaagctgagcataacttcgtatagcatacattatacgaagttatCGGAAATACAGAAGCTGCCCGTCTC<br>GGTCGACTCTAGATCACCAAGTTGATTTGTTTCGGTCAC | LoxP-DHFR 3'UTR         |

**Table S4. Primers for generation of LoxP-DHFR-mCherry amplicons for integration into targeted non-canonical CDPKs**

| Genes         | HR1 F/HR2 R | Sequence (5'-3')                                             |
|---------------|-------------|--------------------------------------------------------------|
| <i>CDPK4</i>  | 4HR1 F      | GCGGTTTCTGCTGGCTTCCCCAGAGAGAATGCGGAGCCACAGGTAAAACGACGGCCAGTG |
|               | 4HR2 R      | GCATTGTTGCAAGCGTCTGGCACCGCCATAAATTCCCAGATAATACGACTCACTATAGG  |
| <i>CDPK4A</i> | 4aHR1 F     | CAAGGACTACGACGTGTCTTGTCCGGTGGTGGGGCAGGGGGCGTAAAACGACGGCCAGTG |
|               | 4aHR2 R     | CGAACGGAGGAGACTGGAAAGCGGCGCAAAAAGACCACGA AATACGACTCACTATAGG  |
| <i>CDPK4B</i> | 4bHR1 F     | TATCGGTCTGACTTCTTCGCTACAGGTCATGGAGCTCTGCCGTAAAACGACGGCCAGTG  |
|               | 4bHR2 R     | CTACCCTGAACTGCCAGGCGAGGATGATGAAGACGTCCGTTTAATACGACTCACTATAGG |
| <i>CDPK6</i>  | 6HR1 F      | GGTGTGCGCCGGCACCTGGCGAGCCGCTCGAACGTACGTGCGTAAAACGACGGCCAGTG  |
|               | 6HR2 R      | AGCGACGAAAGGAAAAAGGCTCGAATCTTGAAATGCGTTTAGAATACGACTCACTATAGG |
| <i>CDPK7A</i> | 7aHR1 F     | GAAGGAAAACCTCCGTTTCTCTTCAATCTgtaaggtgtGTAACGACGGCCAGTG       |
|               | 7aHR2 R     | GTGTATGTAGTCTGGGGATTCAATGAATCGCTGGGAGCTGGAATACGACTCACTATAGG  |
| <i>CDPK8</i>  | 8HR1 F      | GCGCCAACGGGCGGGCAGCAGCCAGACGACGAGGCTCGCCCATAACGACGGCCAGTG    |
|               | 8HR2 R      | GTCTATGTTCCACTGCGGCTTCTCCGCGATTCTCTATCACAAATACGACTCACTATAGG  |
| <i>CDPK9</i>  | 9HR1 F      | AACATGCCGGAGACAAAGGGAGGGGGATATGCAGAGCGTAAGGTAAAACGACGGCCAGTG |
|               | 9HR2 R      | CCTGGTCACCGGCCAGACCCTGCCGAAAAACAGAGAGCAGCTAATACGACTCACTATAGG |

The green sequences in primers match to the M13F sequence in pLoxP-DHFR-mCherry, and the red sequences in primers match to the T7 promoter in the plasmid.



**Table S5. Primers for diagnostic PCRs**

| <b>Genes</b>  | <b>Names</b> | <b>Sequences (5'-3')</b> |
|---------------|--------------|--------------------------|
| <i>CDPK4</i>  | p1           | CGAACCTCCCGCTTTCTCAC     |
|               | p2           | TTGCCTCGTCACTTTCTCTAGC   |
|               | p3           | TTGCCGGTGCACAGTTCCAT     |
|               | p4           | tgtgttcttgctcgcgtgc      |
| <i>CDPK4A</i> | p1           | acctaggccacaaccttacg     |
|               | p2           | CTAGATCAGGGCGTCCGTTC     |
|               | p3           | tacaggtcgatgcagaagcag    |
|               | p4           | ttcgtacagaagccggagat     |
| <i>CDPK4B</i> | p1           | cgcggttcacaaaaggaag      |
|               | p2           | TACAGGGAGGAGAGACAAGG     |
|               | p3           | TGAAAACAGAGGCAACAACG     |
|               | p4           | TCTTGTCTCGCGAAGATCC      |
| <i>CDPK6</i>  | p1           | GAGGTCTACTGCCCGGAACTG    |
|               | p2           | CTGGCTTGGGCAGAGCGACC     |
|               | p3           | TAGTGGTCTGGAGCGTGTAAATC  |
|               | p4           | TTGCTTCATCAACTCAGCAAC    |
| <i>CDPK7A</i> | p1           | GAGCGGTTCTTCGATCTTCTCG   |
|               | p2           | CACACATTCCCTCACATGC      |
|               | p3           | TCTTCAGCTTCGTGCTCCTC     |
|               | p4           | AGAAGGCGAGAAACAAAGTCG    |
| <i>CDPK8</i>  | p1           | AAAGGAAATTGCACTTTGTCTG   |
|               | p2           | CTCGACGTGTACTGAGAGGC     |
|               | p3           | GGGAGAGAAGACCTTTTGG      |
|               | p4           | CACCAAGCCGTCAAAACTACG    |
| <i>CDPK9</i>  | p1           | CCGAACCACACCCTGACTGTC    |
|               | p2           | ACCGCACAGATCGGTGCTC      |
|               | p3           | CCGAAAAAGCGCCTTAGTGCTG   |
|               | p4           | GCCCATATCGAGAGCCTTTGAG   |

**Table S6. Primers for RT-PCRs**

| <b>Genes</b>  | <b>Names</b> | <b>Sequence (5'-3')</b>   |
|---------------|--------------|---------------------------|
| <i>CDPK4</i>  | p7           | GACGTCAGCAACCACGTTCTG     |
|               | p8           | CGATACTCCAGAGGTCACATTTTTC |
| <i>CDPK4A</i> | p9           | GACGTGTCTTGTCGGGTGGTG     |
|               | p10          | AACGTGGTTTAGAGCCTCGTTG    |
| <i>CDPK4B</i> | p11          | TGAAAACAGAGGCAACAACG      |
|               | p12          | TCTTGTCTCGCGAAGATCC       |
| <i>CDPK6</i>  | p13          | CCTCGACTCCAAGAGGCAAG      |
|               | p14          | TTGCTTCATCAACTCAGCAAC     |
| <i>CDPK7A</i> | p15          | TCTTCAGCTTCGTGCTCCTC      |
|               | p16          | AGAAGGCGAGAAACAAAGTCG     |
| <i>CDPK8</i>  | p17          | GGGGAGAGAAGACCTTTTGG      |
|               | p18          | CACCAAGCCGTCAAACTACG      |
| <i>CDPK9</i>  | p19          | CCGAAAAAGCGCCTTAGTGCTG    |
|               | p20          | GCCCATATCGAGAGCCTTTGAG    |
